# Supplementary material for: Rapid Identification of Common Secondary Metabolites of Medicinal Herbs Using High-Performance Liquid Chromatography with Evaporative Light Scattering Detector in Extracts
Source: MDPI journal article supplement (doi:10.3390/metabo11080489), 2021-07-28
Supplement: s1 [file s1]

## **Supplementary material**

### **Rapid Identification of Common Secondary Metabolites of Medicinal Herbs Using High-Performance Liquid Chromatography with Evaporative Light Scattering Detector in Extracts**

**Kiran Ali<sup>a</sup>, Arslan Ali<sup>b</sup>, Muhammad Noman Khan<sup>a</sup>, Saeedur Rahman<sup>a</sup>, Shaheen Faizi<sup>a</sup>, Muhammad Shaiq Ali<sup>a</sup>, Shaden A. M. Khalifa<sup>c</sup>, Hesham R. El-Seedi<sup>c,d,e,\*</sup> and Syed Ghulam Musharraf<sup>a,b,f,\*</sup>**

<sup>a</sup> *H.E.J. Research Institute of Chemistry, International Center for Chemical and Biological Sciences, University of Karachi, Karachi-75270, Pakistan.*

<sup>b</sup> *Dr. Panjwani Center for Molecular Medicine and Drug Research, International Center for Chemical and Biological Sciences, University of Karachi, Karachi-75270, Pakistan.*

<sup>c</sup> *Department of Molecular Biosciences, Stockholm University, the Wenner-Gren Institute, SE-106 91 Stockholm, Sweden.*

<sup>d</sup> *Department of Chemistry, Faculty of Science, Menoufia University, 32512 Shebin El-Kom, Egypt*

<sup>e</sup> *International Research Center for Food Nutrition and Safety, Jiangsu University, Zhenjiang 212013, China.*

<sup>f</sup> *T.C.M. Hospital of Southwest Medical University, Luzhou, Sichuan, China.*

Correspondence:

**Prof. Dr. Syed Ghulam Musharraf**

H.E.J. Research Institute of Chemistry, International Center for Chemical and Biological Sciences, University of Karachi, Karachi-75270, Pakistan.

Tel.: +92 213 4824924-5; 4819010; fax: + 92 213 4819018-9.

E-mail address: [musharraf1977@yahoo.com](mailto:musharraf1977@yahoo.com)

**Prof. Dr. Hesham R. El-Seedi**

Pharmacognosy Group, Department of Pharmaceutical Biosciences, BMC, Uppsala University, SE-751 23 Uppsala, Sweden.

Tel.: +46 73 5668234

E-mail address: [hesham.el-seedi@farmbio.uu.se](mailto:hesham.el-seedi@farmbio.uu.se)

## **Supplementary Figure Legends**

**Supplementary Fig. S1.** Chromatograms, a - d obtained using column 1 with gradients 1- 4 respectively.

**Supplementary Fig. S2.** Chromatograms, a - d obtained using column 2 with gradients 1- 4 respectively.

**Supplementary Fig. S3.** Chromatograms, a - d obtained using column 2 with gradients 1- 4 respectively.

**Supplementary Fig.S4.** Effect of variation of temperature at constant pressure and gain values; a-60°C, b-70°C, c-80°C, d-90°C

**Supplementary Fig. S5.** HPLC-DAD profile obtained for Pool-1 using EC, NUCLEODUR C18 Gravity (100 x 3), 1.8  $\mu$ m.

## **Supplementary Table Legends**

**Supplementary Table S1.** Optimization of chromatographic features on different gradients.

**Supplementary Table S2.** Gradients tested on columns, 1, 2, and 3, prior to obtaining the final gradients.

**Supplementary Table S3.** Retention times of standards using three different columns.

**Supplementary Table S4.** %Accuracy and %RSD of compounds.

**Supplementary Table S5.** Data of compounds detected in Pool-1 (positive and negative ionization modes).

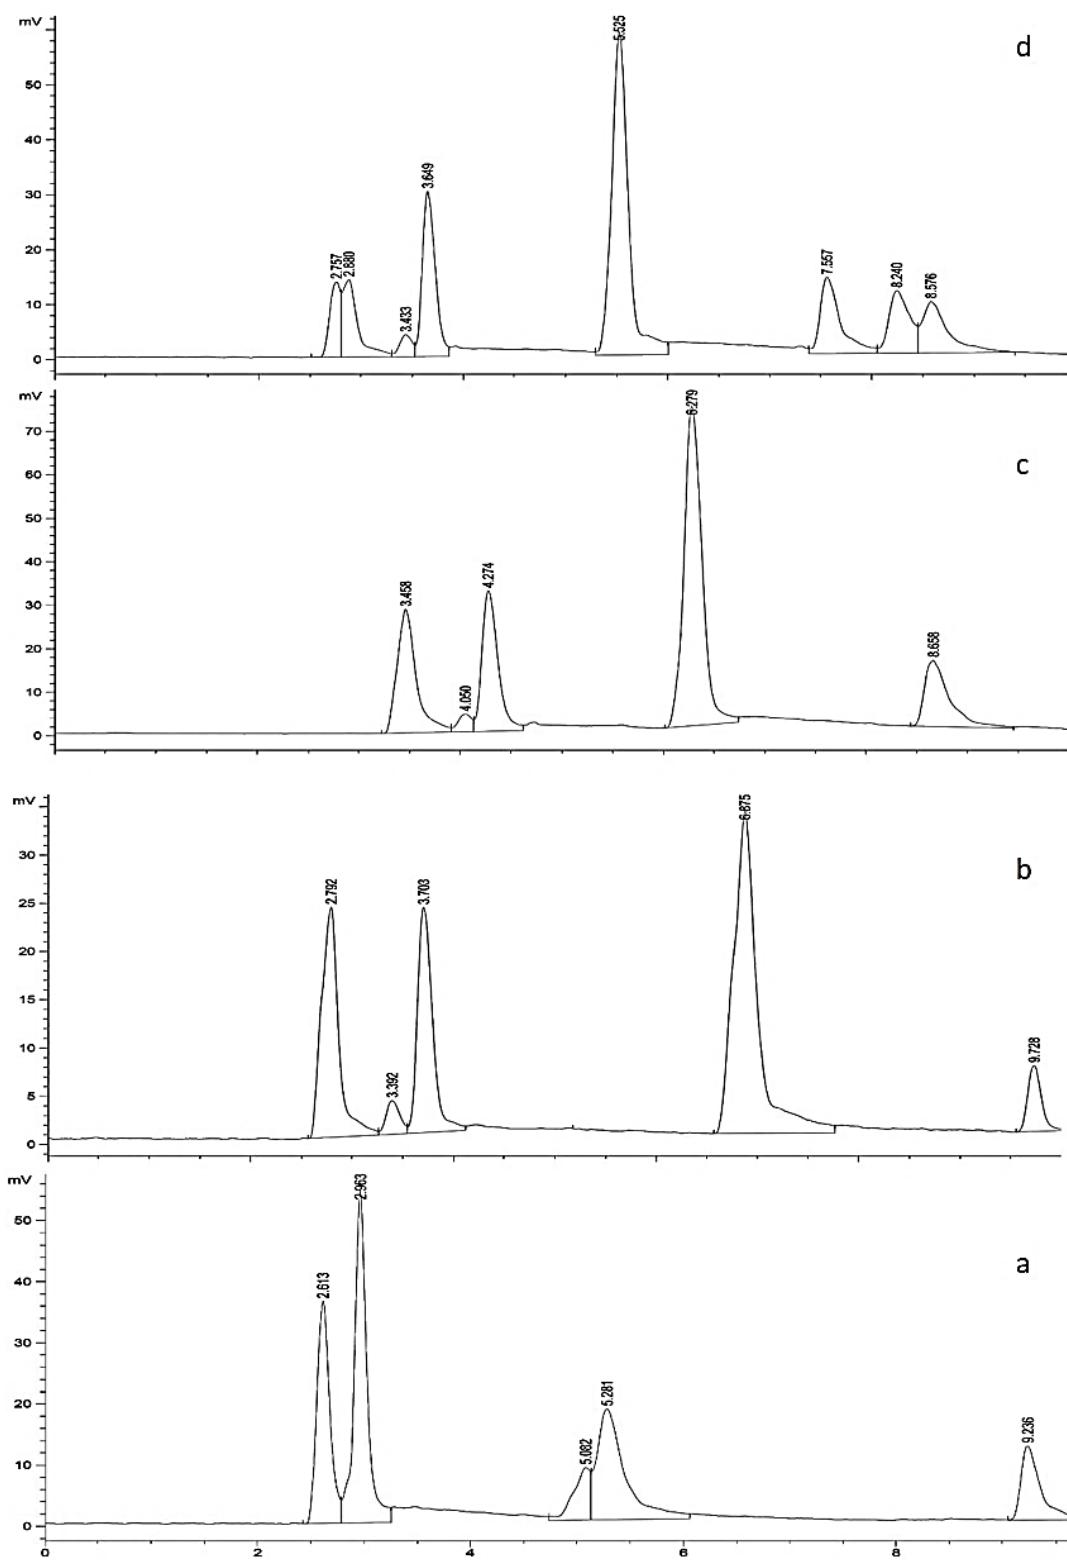

**Supplementary Fig. S1.** Chromatograms, a - d obtained using column 1 with gradients 1- 4 respectively.

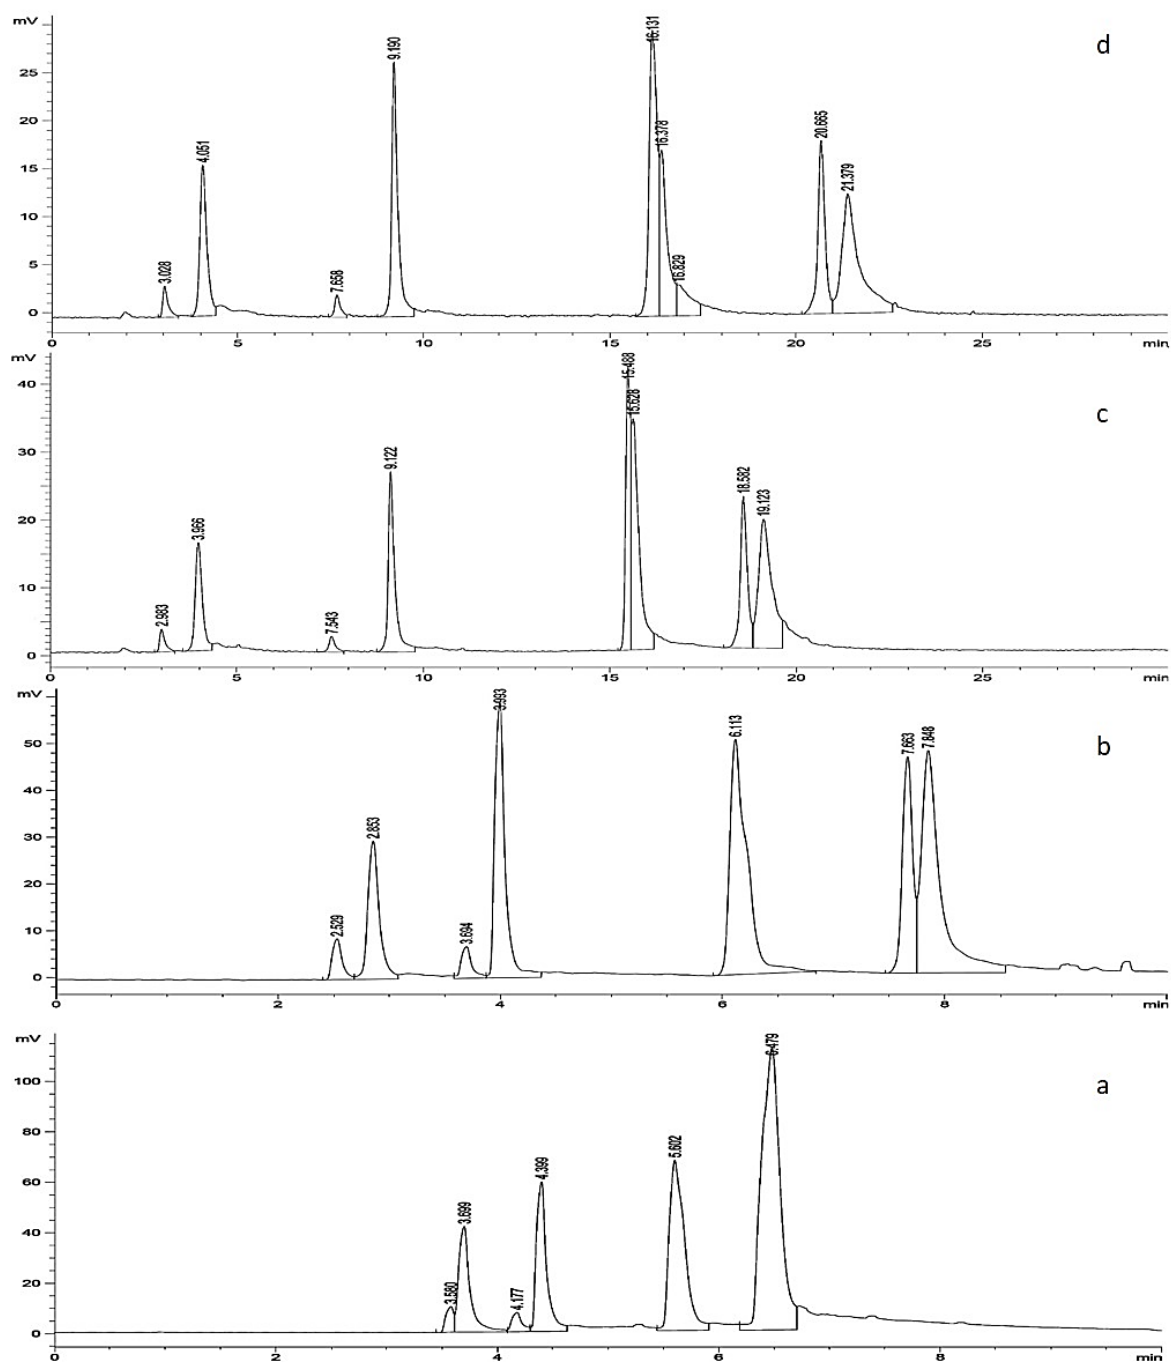

**Supplementary Fig. S2.** Chromatograms, a - d obtained using column 2 with gradients 1 - 4 respectively.

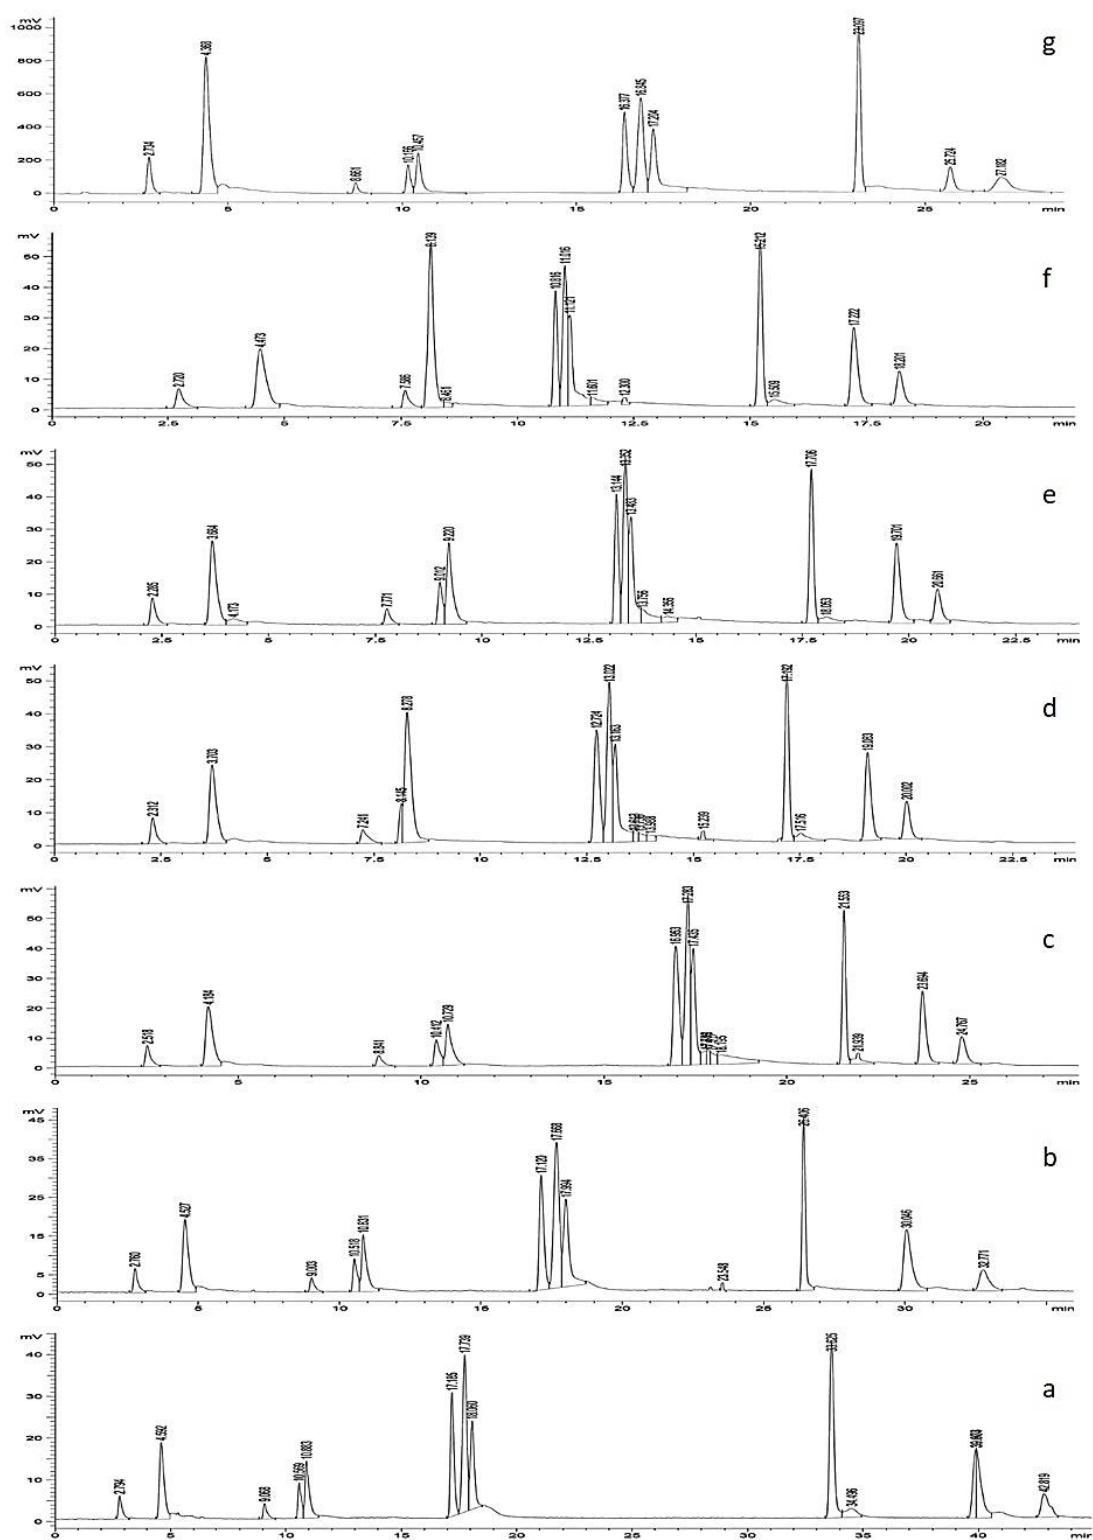

**Supplementary Fig. S3.** Chromatograms, a - g obtained using column 3 with gradients 1 - 7 respectively.

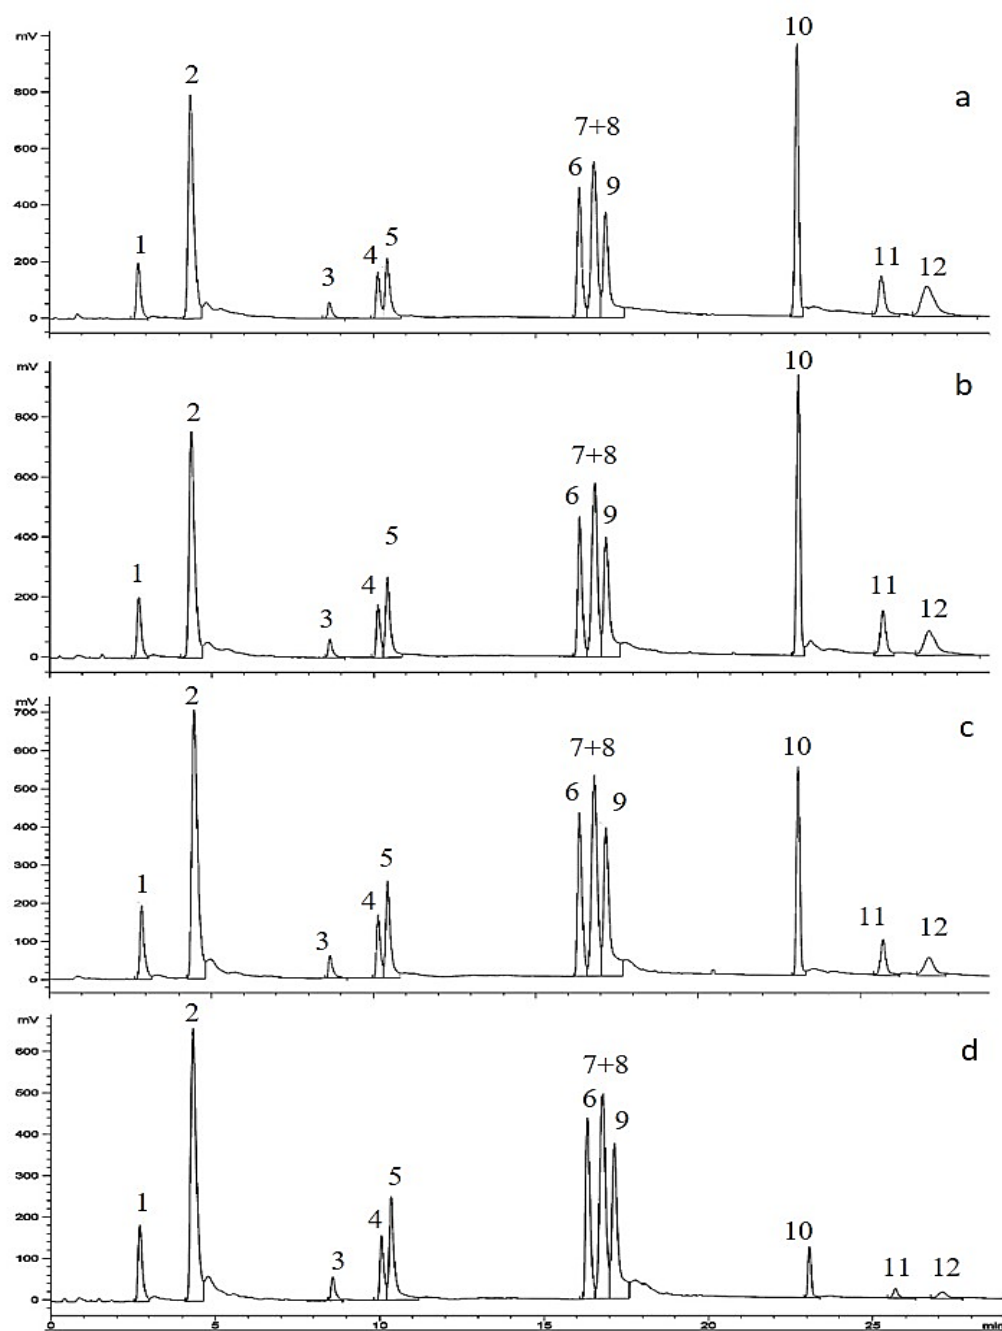

**Supplementary Fig.S4.** Effect of variation of temperature at constant pressure and gain values;  
a-60°C, b-70°C, c-80°C, d-90°C

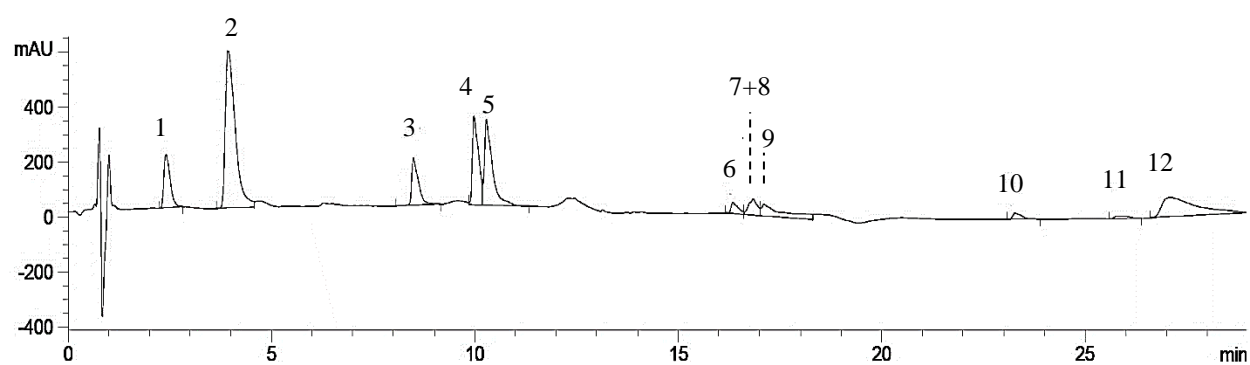

**Supplementary Fig. S5.** HPLC-DAD profile obtained for Pool-1 at 210 nm, using EC, NUCLEODUR C18 Gravity (100 x 3), 1.8  $\mu$ m.

**Supplementary Table S1.** Optimization of chromatographic features on different gradients.

| Compound  | Gradient method | Rt     | Width  | Rs     |
|-----------|-----------------|--------|--------|--------|
| Quercetin | 1               | 9.068  | 0.1494 | 10.090 |
| Quercetin | 2               | 9.003  | 0.1635 | 9.834  |
| Quercetin | 3               | 8.841  | 0.1573 | 10.271 |
| Quercetin | 4               | 7.241  | 0.1633 | 7.349  |
| Quercetin | 5               | 7.771  | 0.1274 | 10.303 |
| Quercetin | 6               | 7.586  | 0.1328 | 4.247  |
| Quercetin | 7               | 8.102  | 0.1312 | 11.470 |
|           |                 |        |        |        |
| Rutin     | 1               | 2.794  | 0.1632 | 9.78   |
| Rutin     | 2               | 2.760  | 0.1614 | 9.83   |
| Rutin     | 3               | 2.518  | 0.1441 | 9.82   |
| Rutin     | 4               | 2.312  | 0.1306 | 9.30   |
| Rutin     | 5               | 2.285  | 0.1344 | 9.27   |
| Rutin     | 6               | 2.720  | 0.1593 | 9.54   |
| Rutin     | 7               | 2.325  | 0.1337 | 9.11   |
|           |                 |        |        |        |
| Taxifolin | 1               | 4.592  | 0.2042 | 9.78   |
| Taxifolin | 2               | 4.527  | 0.1981 | 9.83   |
| Taxifolin | 3               | 4.184  | 0.1950 | 9.82   |
| Taxifolin | 4               | 3.703  | 0.1684 | 9.30   |
| Taxifolin | 5               | 3.684  | 0.1673 | 9.27   |
| Taxifolin | 6               | 4.473  | 0.2082 | 9.54   |
| Taxifolin | 7               | 3.730  | 0.1745 | 9.11   |
|           |                 |        |        |        |
| Apigenin  | 1               | 10.569 | 0.1481 | 1.89   |
| Apigenin  | 2               | 10.518 | 0.1446 | 1.93   |
| Apigenin  | 3               | 10.412 | 0.1486 | 1.98   |
| Apigenin  | 4               | 8.145  | 0.0827 | 1.06   |
| Apigenin  | 5               | 9.012  | 0.1135 | 1.626  |



|                               |   |        |        |       |
|-------------------------------|---|--------|--------|-------|
| Apigenin                      | 6 | 8.139  | 0.1276 | 0     |
| Apigenin                      | 7 | 9.615  | 0.1326 | 0.169 |
|                               |   |        |        |       |
| Kaempferol                    | 1 | 10.883 | 0.1839 | 1.89  |
| Kaempferol                    | 2 | 10.831 | 0.1794 | 1.93  |
| Kaempferol                    | 3 | 10.729 | 0.1700 | 1.98  |
| Kaempferol                    | 4 | 8.278  | 0.1662 | 1.06  |
| Kaempferol                    | 5 | 9.220  | 0.1423 | 1.626 |
| Kaempferol                    | 6 | 8.139  | 0.1276 | 0     |
| Kaempferol                    | 7 | 9.906  | 0.1572 | 0.169 |
|                               |   |        |        |       |
| Betulinic acid                | 1 | 17.185 | 0.1640 | 3.07  |
| Betulinic acid                | 2 | 17.120 | 0.1682 | 2.89  |
| Betulinic acid                | 3 | 16.953 | 0.1691 | 2.19  |
| Betulinic acid                | 4 | 12.724 | 0.1476 | 2.25  |
| Betulinic acid                | 5 | 13.144 | 0.1027 | 1.94  |
| Betulinic acid                | 6 | 10.816 | 0.0963 | 1.98  |
| Betulinic acid                | 7 | 16.032 | 0.1541 | 2.62  |
|                               |   |        |        |       |
| Ursolic acid + Oleanolic acid | 1 | 17.739 | 0.1965 | 1.69  |
| Ursolic acid + Oleanolic acid | 2 | 17.668 | 0.2110 | 1.54  |
| Ursolic acid + Oleanolic acid | 3 | 17.283 | 0.1320 | 1.22  |
| Ursolic acid + Oleanolic acid | 4 | 13.022 | 0.1171 | 1.13  |
| Ursolic acid + Oleanolic acid | 5 | 13.352 | 0.1111 | 1.18  |
| Ursolic acid + Oleanolic acid | 6 | 11.016 | 0.1053 | 0.97  |
| Ursolic acid + Oleanolic acid | 7 | 16.462 | 0.1729 | 1.37  |
|                               |   |        |        |       |
| Betulin                       | 1 | 18.060 | 0.1832 | 1.69  |
| Betulin                       | 2 | 17.994 | 0.2103 | 1.54  |
| Betulin                       | 3 | 17.435 | 0.1161 | 1.22  |
| Betulin                       | 4 | 13.163 | 0.1309 | 1.13  |
| Betulin                       | 5 | 13.483 | 0.1107 | 1.18  |

|                |   |        |        |       |
|----------------|---|--------|--------|-------|
| Betulin        | 6 | 11.121 | 0.1111 | 0.97  |
| Betulin        | 7 | 16.739 | 0.2304 | 1.37  |
|                |   |        |        |       |
| Lupeol         | 1 | 33.625 | 0.1932 | 2.81  |
| Lupeol         | 2 | 26.406 | 0.1295 | 17.42 |
| Lupeol         | 3 | 21.553 | 0.1056 | 2.66  |
| Lupeol         | 4 | 17.192 | 0.1060 | 1.73  |
| Lupeol         | 5 | 17.706 | 0.1093 | 1.75  |
| Lupeol         | 6 | 15.212 | 0.1035 | 1.67  |
| Lupeol         | 7 | 22.552 | 0.1056 | 1.68  |
|                |   |        |        |       |
| Stigmasterol   | 1 | 39.904 | 0.1871 | 11.82 |
| Stigmasterol   | 2 | 30.046 | 0.2882 | 9.26  |
| Stigmasterol   | 3 | 23.694 | 0.1678 | 5.81  |
| Stigmasterol   | 4 | 19.083 | 0.1523 | 5.97  |
| Stigmasterol   | 5 | 19.701 | 0.1657 | 5.70  |
| Stigmasterol   | 6 | 17.222 | 0.1545 | 6.12  |
| Stigmasterol   | 7 | 24.497 | 0.1517 | 6.10  |
|                |   |        |        |       |
| Betasitosterol | 1 | 42.819 | 0.3061 | 11.82 |
| Betasitosterol | 2 | 32.771 | 0.2998 | 9.26  |
| Betasitosterol | 3 | 24.767 | 0.2029 | 5.81  |
| Betasitosterol | 4 | 20.002 | 0.1554 | 5.97  |
| Betasitosterol | 5 | 20.661 | 0.1710 | 5.70  |
| Betasitosterol | 6 | 18.201 | 0.1651 | 6.12  |
| Betasitosterol | 7 | 25.441 | 0.1577 | 6.10  |

**Supplementary Table S2.** Gradients tested on columns, 1, 2, and 3, prior to obtaining the final gradients.

| Columns  | Gradient 1 |     |                       | Gradient 2 |     |                       | Gradient 3 |     |                       | Gradient 4 |      |                       | Gradient 5 |     |                       | Gradient 6 |      |                       |
|----------|------------|-----|-----------------------|------------|-----|-----------------------|------------|-----|-----------------------|------------|------|-----------------------|------------|-----|-----------------------|------------|------|-----------------------|
|          | Time       | % B | Flow Rate<br>(mL/min) | Time       | % B | Flow Rate<br>(mL/min) | Time       | % B | Flow Rate<br>(mL/min) | Time       | % B  | Flow Rate<br>(mL/min) | Time       | % B | Flow Rate<br>(mL/min) | Time       | % B  | Flow Rate<br>(mL/min) |
| column 1 | 1          | 10  | 1                     | 1          | 10  | 1                     | 1          | 10  | 0.7                   |            |      |                       |            |     |                       |            |      |                       |
|          | 2          | 65  | 1                     | 1.5        | 25  | 1                     | 5          | 98  | 0.7                   |            |      |                       |            |     |                       |            |      |                       |
|          | 4          | 65  | 1                     | 7.5        | 98  | 1                     | 7.5        | 98  | 0.7                   |            |      |                       |            |     |                       |            |      |                       |
|          | 4.5        | 80  | 1                     | 8.5        | 98  | 1                     | 9          | 10  | 0.7                   |            |      |                       |            |     |                       |            |      |                       |
|          | 6.5        | 80  | 1                     | 9          | 10  | 1                     | 10         | 10  | 0.7                   |            |      |                       |            |     |                       |            |      |                       |
|          | 7          | 98  | 1                     | 10         | 10  | 1                     |            |     |                       |            |      |                       |            |     |                       |            |      |                       |
|          | 8.5        | 98  | 1                     |            |     |                       |            |     |                       |            |      |                       |            |     |                       |            |      |                       |
|          | 9          | 10  | 1                     |            |     |                       |            |     |                       |            |      |                       |            |     |                       |            |      |                       |
|          | 10         | 10  | 1                     |            |     |                       |            |     |                       |            |      |                       |            |     |                       |            |      |                       |
|          |            |     |                       |            |     |                       |            |     |                       |            |      |                       |            |     |                       |            |      |                       |
| column 2 | 0          | 10  | 1                     | 0          | 20  | 1                     | 0          | 20  | 0.5                   |            |      |                       |            |     |                       |            |      |                       |
|          | 1          | 10  | 1                     | 1          | 20  | 1                     | 2          | 20  | 0.5                   |            |      |                       |            |     |                       |            |      |                       |
|          | 5          | 98  | 1                     | 2          | 40  | 1                     | 10         | 50  | 0.5                   |            |      |                       |            |     |                       |            |      |                       |
|          | 7.5        | 98  | 1                     | 7.5        | 98  | 1                     | 10.5       | 50  | 0.5                   |            |      |                       |            |     |                       |            |      |                       |
|          | 9          | 10  | 1                     | 8.5        | 98  | 1                     | 12         | 70  | 0.5                   |            |      |                       |            |     |                       |            |      |                       |
|          | 10         | 10  | 1                     | 9          | 20  | 1                     | 25         | 98  | 0.5                   |            |      |                       |            |     |                       |            |      |                       |
|          |            |     |                       | 10         | 20  | 1                     | 26         | 98  | 0.5                   |            |      |                       |            |     |                       |            |      |                       |
|          |            |     |                       |            |     |                       | 28         | 20  | 0.5                   |            |      |                       |            |     |                       |            |      |                       |
|          |            |     |                       |            |     |                       | 30         | 20  | 0.5                   |            |      |                       |            |     |                       |            |      |                       |
|          |            |     |                       |            |     |                       |            |     |                       |            |      |                       |            |     |                       |            |      |                       |
| column 3 | 0          | 20  | 0.5                   | 0          | 20  | 0.5                   | 0          | 20  | 0.5                   | 0          | 20   | 0.6                   | 0          | 20  | 0.6                   | 0          | 20   | 0.5                   |
|          | 2          | 20  | 0.5                   | 2          | 20  | 0.5                   | 2          | 20  | 0.5                   | 2          | 20   | 0.6                   | 2          | 20  | 0.6                   | 2          | 20   | 0.5                   |
|          | 10         | 45  | 0.5                   | 10         | 45  | 0.5                   | 10         | 45  | 0.5                   | 4          | 31   | 0.6                   | 6          | 35  | 0.6                   | 4          | 31   | 0.5                   |
|          | 11         | 85  | 0.5                   | 11         | 85  | 0.5                   | 12         | 87  | 0.5                   | 4.5        | 39   | 0.6                   | 7.5        | 45  | 0.6                   | 4.5        | 39   | 0.5                   |
|          | 20         | 88  | 0.5                   | 20         | 88  | 0.5                   | 17         | 100 | 0.5                   | 5.5        | 43   | 0.6                   | 9          | 88  | 0.6                   | 5.5        | 43   | 0.5                   |
|          | 22         | 91  | 0.5                   | 21         | 100 | 1                     | 17.5       | 100 | 1.3                   | 6.5        | 85   | 0.4                   | 12         | 89  | 0.6                   | 7          | 85   | 0.5                   |
|          | 22.5       | 100 | 0.5                   | 26         | 100 | 1                     | 24         | 100 | 1.3                   | 9          | 86.5 | 0.5                   | 13.5       | 100 | 1.3                   | 8          | 86.5 | 0.8                   |
|          | 40         | 100 | 0.5                   | 31         | 100 | 0.5                   | 26         | 20  | 0.5                   | 11         | 88   | 0.5                   | 20.5       | 100 | 1.3                   | 10         | 88   | 0.8                   |
|          | 43         | 20  | 0.5                   | 34         | 20  | 0.5                   | 28         | 20  | 0.5                   | 12.5       | 100  | 0.5                   | 22         | 20  | 0.6                   | 10.5       | 100  | 1.3                   |
|          | 45         | 20  | 0.5                   | 36         | 20  | 0.5                   |            |     |                       | 13         | 100  | 1.3                   | 24         | 20  | 0.6                   | 18.5       | 100  | 1.3                   |
|          |            |     |                       |            |     |                       |            |     |                       | 20.5       | 100  | 1.3                   |            |     |                       | 20.5       | 20   | 0.5                   |
|          |            |     |                       |            |     |                       |            |     |                       | 22.5       | 20   | 0.5                   |            |     |                       | 22         | 20   | 0.5                   |
|          |            |     |                       |            |     |                       |            |     |                       | 24         | 20   | 0.5                   |            |     |                       |            |      |                       |
|          |            |     |                       |            |     |                       |            |     |                       |            |      |                       |            |     |                       |            |      |                       |
|          |            |     |                       |            |     |                       |            |     |                       |            |      |                       |            |     |                       |            |      |                       |
|          |            |     |                       |            |     |                       |            |     |                       |            |      |                       |            |     |                       |            |      |                       |

**Supplementary Table S3.** Retention times of standards using three different columns.

| HPLC column                                  | Flow rate<br>(mL/min)         | Standard compounds |      |      |       |       |       |       |       |       |       |       |       |
|----------------------------------------------|-------------------------------|--------------------|------|------|-------|-------|-------|-------|-------|-------|-------|-------|-------|
|                                              |                               | 2                  | 1    | 3    | 4     | 5     | 6     | 7     | 8     | 9     | 10    | 11    | 12    |
| Poroshell 120 EC-C18 (3.0 x 50 mm) 2.7µm     | 1mL/min                       | 2.76               | 2.93 | 3.46 | 3.64  | 3.70  | 5.48  | 5.58  | 5.61  | 5.53  | 7.59  | 8.28  | 8.65  |
| ZORBAX Eclipse XDB-Phenyl (4.6 x 75mm) 3.5µm | 0.5mL/min                     | 4.17               | 3.13 | 7.78 | 9.26  | 9.30  | 16.30 | 16.20 | 16.21 | 16.49 | 20.80 | 21.39 | 21.56 |
| EC, NUCLEODUR C18 Gravity (100 x 3), 1.8 µm  | 0.6mL/min<br>To<br>1.3 mL/min | 4.36               | 2.75 | 8.64 | 10.14 | 10.43 | 16.35 | 16.80 | 16.80 | 17.16 | 23.06 | 25.66 | 27.07 |

**Supplementary Table S4.** %Accuracy and %RSD of compounds.

| Compound Name     | Concentrations in µg/L | Intra-day                    |      |           | Inter-day                    |      |           |
|-------------------|------------------------|------------------------------|------|-----------|------------------------------|------|-----------|
|                   |                        | Found concentration in µg/mL | %RSD | %Accuracy | Found concentration in µg/mL | %RSD | %Accuracy |
| <b>Rutin</b>      | 200                    | 185.35±0.01                  | 2.86 | 92.67     | 191.46±0.00                  | 0.74 | 95.73     |
|                   | 400                    | 466.01±0.01                  | 1.38 | 116.50    | 454.77±0.01                  | 1.37 | 113.69    |
|                   | 620                    | 726.61±0.04                  | 5.94 | 117.19    | 694.12±0.02                  | 2.74 | 111.96    |
|                   | 870                    | 884.44±0.08                  | 8.58 | 101.66    | 876.11±0.01                  | 1.56 | 100.70    |
| <b>Taxifolin</b>  | 200                    | 140.98±0.00                  | 1.73 | 70.5      | 156.60±0.01                  | 7.75 | 78.30     |
|                   | 400                    | 311.78±0.01                  | 2.71 | 77.9      | 313.73±0.01                  | 2.39 | 78.43     |
|                   | 620                    | 494.84±0.03                  | 5.32 | 79.8      | 513.37±0.01                  | 2.27 | 82.80     |
|                   | 870                    | 554.23±0.02                  | 4.31 | 63.7      | 620.68±0.04                  | 6.91 | 71.34     |
| <b>Quercetin</b>  | 200                    | 212.09±0.00                  | 0.50 | 106.04    | 210.38±0.00                  | 0.70 | 105.19    |
|                   | 400                    | 469.77±0.01                  | 1.91 | 117.44    | 462.57±0.00                  | 0.53 | 115.64    |
|                   | 620                    | 743.70±0.05                  | 7.21 | 119.95    | 691.92±0.01                  | 1.22 | 111.60    |
|                   | 870                    | 909.98±0.06                  | 6.23 | 104.59    | 877.88±0.01                  | 0.90 | 100.91    |
| <b>Apigenin</b>   | 200                    | 215.74±0.00                  | 2.28 | 107.86    | 210.89±0.00                  | 0.40 | 105.45    |
|                   | 400                    | 463.15±0.01                  | 2.53 | 115.78    | 455.82±0.00                  | 0.46 | 113.95    |
|                   | 620                    | 725.22±0.05                  | 7.29 | 116.97    | 682.26±0.01                  | 1.54 | 110.04    |
|                   | 870                    | 845.62±0.02                  | 2.33 | 97.19     | 855.72±0.01                  | 0.74 | 98.36     |
| <b>Kaempferol</b> | 200                    | 163.83±0.01                  | 4.10 | 81.91     | 170.40±0.00                  | 1.99 | 85.20     |

|                                          |     |             |      |        |             |      |        |
|------------------------------------------|-----|-------------|------|--------|-------------|------|--------|
|                                          | 400 | 458.30±0.01 | 2.25 | 114.57 | 451.29±0.01 | 1.19 | 112.82 |
|                                          | 620 | 722.72±0.01 | 1.95 | 116.56 | 697.09±0.01 | 1.72 | 112.43 |
|                                          | 870 | 858.57±0.07 | 7.88 | 98.68  | 874.70±0.01 | 1.21 | 100.5  |
| <b>Betulinic acid</b>                    | 200 | 207.14±0.00 | 0.77 | 103.57 | 206.42±0.01 | 2.93 | 103.21 |
|                                          | 400 | 489.35±0.02 | 3.13 | 122.33 | 476.55±0.00 | 0.77 | 119.14 |
|                                          | 620 | 753.02±0.03 | 4.16 | 121.45 | 704.98±0.02 | 2.29 | 113.71 |
|                                          | 870 | 902.88±0.04 | 4.36 | 103.77 | 866.14±0.01 | 1.62 | 99.56  |
| <b>Oleanolic acid +<br/>Ursolic acid</b> | 200 | 199.08±0.00 | 1.73 | 99.53  | 201.75±0.00 | 0.83 | 100.88 |
|                                          | 400 | 520.83±0.02 | 3.68 | 130.20 | 502.17±0.00 | 0.38 | 125.54 |
|                                          | 620 | 786.26±0.04 | 4.92 | 126.81 | 775.23±0.03 | 3.75 | 125.04 |
|                                          | 870 | 942.50±0.01 | 0.97 | 108.33 | 884.88±0.04 | 4.79 | 101.71 |
| <b>Betulin</b>                           | 200 | 213.89±0.00 | 1.07 | 106.94 | 210.05±0.00 | 1.17 | 105.02 |
|                                          | 400 | 513.00±0.02 | 3.40 | 128.25 | 500.84±0.01 | 1.72 | 100.84 |
|                                          | 620 | 780.05±0.04 | 4.65 | 125.81 | 760.85±0.02 | 2.41 | 122.72 |
|                                          | 870 | 931.76±0.06 | 6.26 | 107.09 | 912.80±0.04 | 4.41 | 104.9  |
| <b>Lupeol</b>                            | 200 | 203.87±0.00 | 1.06 | 101.93 | 200.35±0.00 | 0.54 | 100.18 |
|                                          | 400 | 461.61±0.00 | 1.00 | 115.40 | 454.45±0.00 | 0.68 | 113.61 |
|                                          | 620 | 716.61±0.01 | 0.88 | 115.58 | 691.09±0.02 | 3.59 | 111.47 |
|                                          | 870 | 895.35±0.04 | 4.26 | 102.91 | 850.24±0.02 | 1.80 | 97.73  |
| <b>Stigmasterol</b>                      | 200 | 207.82±0.00 | 0.69 | 103.91 | 204.81±0.01 | 3.47 | 102.41 |
|                                          | 400 | 464.49±0.01 | 1.35 | 116.12 | 455.42±0.00 | 0.85 | 113.85 |

|  |     |             |      |        |             |      |        |
|--|-----|-------------|------|--------|-------------|------|--------|
|  | 620 | 671.42±0.04 | 5.67 | 108.29 | 643.43±0.01 | 1.34 | 103.78 |
|  | 870 | 658.36±0.00 | 0.42 | 75.67  | 688.68±0.04 | 5.98 | 79.16  |

**Supplementary Table S5.** LC-ESI-MS/MS data of compounds detected in Pool-1 (positive and negative ionization modes).

| S. No. | Compound name | Formula                                         | RT (min) | Ion Type           | m/z measured (intensity)         | m/z calculated | Error (ppm) | mSigma | MS/MS                                                                                                                                                                                                                                                           |
|--------|---------------|-------------------------------------------------|----------|--------------------|----------------------------------|----------------|-------------|--------|-----------------------------------------------------------------------------------------------------------------------------------------------------------------------------------------------------------------------------------------------------------------|
| 1      | Rutin         | C <sub>27</sub> H <sub>30</sub> O <sub>16</sub> | 2.02     | [M+H] <sup>+</sup> | 611.1604 (3.41x10 <sup>5</sup> ) | 611.1607       | 0.4         | 1.7    | 303.0497, 229.0495, 305.0551<br>304.053                                                                                                                                                                                                                         |
|        |               |                                                 |          | [M-H] <sup>-</sup> | 609.1472 (4.30x10 <sup>5</sup> ) | 609.1461       | -1.8        | 1.4    | 203.0121, 300.0281, 301.0348<br>301.0462, 609.1449, 610.1527                                                                                                                                                                                                    |
| 2      | Taxifolin     | C <sub>15</sub> H <sub>12</sub> O <sub>7</sub>  | 3.2      | [M+H] <sup>+</sup> | 305.0654 (3.02x10 <sup>5</sup> ) | 305.066        | 0.5         | 2.3    | 149.0234, 153.0184, 154.0225, 167.0341, 185.0603, 195.0287, 213.0551, 231.0655, 232.0684, 241.0493, 259.0604, 260.0645                                                                                                                                          |
|        |               |                                                 |          | [M-H] <sup>-</sup> | 303.0516 (6.51x10 <sup>5</sup> ) | 303.051        | -1.8        | 2.1    | 241.0501, 151.0427, 153.0198<br>174.9533, 175.0397, 176.5807<br>177.0198, 178.9988, 199.0401<br>217.0499, 218.0535, 235.0622<br>259.059, 275.0567, 285.04<br>286.0419, 492.1735                                                                                 |
| 3.     | Quercetin     | C <sub>15</sub> H <sub>10</sub> O <sub>7</sub>  | 6.87     | [M+H] <sup>+</sup> | 303.0498 (1.46x10 <sup>5</sup> ) | 303.0499       | 0.5         | 3.5    | 137.0233, 153.0183, 154.0219, 155.0495, 161.0594, 163.0392, 165.0185, 173.0599, 179.0338, 183.0439, 187.0392, 201.0546, 202.0579, 211.0393, 228.0419, 229.0496, 230.0534, 239.0334, 245.0449, 247.061, 257.0445, 258.0484, 274.0475, 285.0398, 303.05, 304.0521 |
|        |               |                                                 |          | [M-H] <sup>-</sup> | 301.0357 (3.65x10 <sup>5</sup> ) | 301.0354       | -1          | 1.5    | 151.0041, 170.2741, 178.9988<br>186.9933, 257.0501, 271.0268<br>273.0415, 299.0215, 301.0351<br>301.0555, 302.0383, 302.0505                                                                                                                                    |
| 4.     | Apigenin      | C <sub>15</sub> H <sub>10</sub> O <sub>5</sub>  | 8.35     | [M+H] <sup>+</sup> | 271.06 (6.12x10 <sup>5</sup> )   | 271.0601       | 0.6         | 1.7    | 145.0282, 153.0182, 154.0213, 163.0386, 197.0592, 225.0545, 229.0498, 243.0648, 271.0599, 272.0635                                                                                                                                                              |
|        |               |                                                 |          | [M-H] <sup>-</sup> | 269.0459 (7.31x10 <sup>5</sup> ) | 269.0455       | -1.3        | 15.8   | 149.0235, 269.0453, 270.0484<br>270.0644, 271.0531                                                                                                                                                                                                              |



|     |                |                                                |       |                                          |                                                                           |                          |             |             |                                                                                                                                                                                                                                                 |
|-----|----------------|------------------------------------------------|-------|------------------------------------------|---------------------------------------------------------------------------|--------------------------|-------------|-------------|-------------------------------------------------------------------------------------------------------------------------------------------------------------------------------------------------------------------------------------------------|
| 5.  | Kaempferol     | C <sub>15</sub> H <sub>10</sub> O <sub>6</sub> | 8.62  | [M+H] <sup>+</sup><br>[M-H] <sup>-</sup> | 287.055<br>(3.95x10 <sup>5</sup> )<br>285.0409<br>(7.30x10 <sup>5</sup> ) | 287.055<br>285.0405      | 0.2<br>-1.4 | 2.8<br>17.3 | 147.044, 153.0181, 154.0214<br>157.0647, 161.0593, 165.0181<br>171.0441, 184.0515, 185.0596<br>213.0544, 214.0583, 229.0498<br>231.0648, 241.049, 258.052<br>259.0588, 287.0548, 288.0585<br><br>240.854, 285.039, 286.0428<br>286.081, 287.045 |
| 6.  | Betulinic acid | C <sub>30</sub> H <sub>48</sub> O <sub>3</sub> | 14.33 | [M+H] <sup>+</sup><br>[M-H] <sup>-</sup> | 457.3676<br>(4.03x10 <sup>3</sup> )<br>455.3518<br>(4x10 <sup>4</sup> )   | 457.3676<br>455.351972   | 0<br>0.2    | 28.9<br>5.3 | 147.1178, 149.1312, 161.1314<br>163.1487, 173.1318, 175.1112<br>175.1476, 187.1107, 189.1628<br>203.1793, 337.2165<br><br>248.9604, 409.2434, 409.2614<br>410.2483, 455.3525, 456.3564<br>457.3593                                              |
| 7.  | Oleanolic acid | C <sub>30</sub> H <sub>48</sub> O <sub>3</sub> | 14.71 | [M+H] <sup>+</sup>                       | 457.3676<br>(1.04x10 <sup>3</sup> )                                       | 457.3657                 | 0.1         | 16.5        | 149.1312, 308.27, 417.33                                                                                                                                                                                                                        |
| 8.  | Ursolic acid   | C <sub>30</sub> H <sub>48</sub> O <sub>3</sub> | 14.71 | [M+H] <sup>+</sup>                       | 457.3679<br>(1.29x10 <sup>4</sup> )                                       | 457.3676                 | 0.1         | 16.5        | 149.1361, 161.1323, 191.1798                                                                                                                                                                                                                    |
| 9.  | Betulin        | C <sub>30</sub> H <sub>50</sub> O <sub>2</sub> | 16.02 | [M+H] <sup>+</sup><br>[M-H] <sup>-</sup> | 443.3883<br>(4.92x10 <sup>3</sup> )                                       | 443.3884<br>441.372707   | 0<br>NF     | 9.4<br>NF   | 147.1163, 149.132, 161.1325<br>163.148, 177.1627, 189.1634<br>191.1776<br>NF                                                                                                                                                                    |
| 10. | Lupeol         | C <sub>30</sub> H <sub>50</sub> O              | NF    | [M+H] <sup>+</sup><br>[M-H] <sup>-</sup> | NF                                                                        | 427.393443<br>425.377793 | NC          | NC          | NF                                                                                                                                                                                                                                              |
| 11. | Stigmasterol   | C <sub>29</sub> H <sub>48</sub> O              | NF    | [M+H] <sup>+</sup><br>[M-H] <sup>-</sup> | NF                                                                        | 413.377793<br>411.362143 | NC          | NC          | NF                                                                                                                                                                                                                                              |

|     |                |                                   |    |                                          |    |                          |     |    |    |
|-----|----------------|-----------------------------------|----|------------------------------------------|----|--------------------------|-----|----|----|
| 12. | Betasitosterol | C <sub>29</sub> H <sub>50</sub> O | NF | [M+H] <sup>+</sup><br>[M-H] <sup>-</sup> | NF | 415.393443<br>413.377793 | 1NC | NC | NF |
|-----|----------------|-----------------------------------|----|------------------------------------------|----|--------------------------|-----|----|----|

---

<sup>NF</sup> not found

<sup>NC</sup> not calculated
